# Supplementary material for: Exosome-Transmitted tRF-16-K8J7K1B Promotes Tamoxifen Resistance by Reducing Drug-Induced Cell Apoptosis in Breast Cancer
Source: MDPI journal article supplement (doi:10.3390/cancers15030899), 2023-01-31
Supplement: s1 [file s1]

**Supplementary Table S3: Antibody**

| Antigens          | Manufacturer            | Application                  |
|-------------------|-------------------------|------------------------------|
| CD9               | Affinity, AF5139        | 1:1000 for WB                |
| CD63              | Affinity, AF5117        | 1:1000 for WB                |
| TSG101            | Proteintech, 14497-1-AP | 1:1000 for WB                |
| Alix              | Proteintech, 12422-1-AP | 1:1000 for WB                |
| TRAIL             | Proteintech, 27064-1-AP | 1:1000 for WB, 1:500 for IHC |
| Cleaved Caspase 3 | Affinity, AF7022        | 1:1000 for WB, 1:500 for IHC |
| Cleaved PARP      | Affinity, AF7023        | 1:1000 for WB, 1:500 for IHC |
| $\beta$ -Actin    | Proteintech, 66009-1-Ig | 1:1000 for WB                |
