# Supplementary material for: Exosome-Transmitted tRF-16-K8J7K1B Promotes Tamoxifen Resistance by Reducing Drug-Induced Cell Apoptosis in Breast Cancer
Source: MDPI journal article supplement (doi:10.3390/cancers15030899), 2023-01-31
Supplement: s1 [file s1]

Table S1. Clinical characteristic of breast cancer patients

| Variables                    |               | Number(N=56) |        |
|------------------------------|---------------|--------------|--------|
| <b>Age</b>                   |               |              |        |
|                              | <50           | 30           | 53.60% |
|                              | ≥50           | 26           | 46.40% |
| <b>Tumor size</b>            |               |              |        |
|                              | T1/T2         | 51           | 91.10% |
|                              | T3/T4         | 5            | 8.90%  |
| <b>Lymph node metastasis</b> |               |              |        |
|                              | N0            | 12           | 21.40% |
|                              | N1            | 24           | 42.90% |
|                              | N2            | 13           | 23.20% |
|                              | N3            | 7            | 12.50% |
| <b>Pathological stage</b>    |               |              |        |
|                              | I             | 4            | 7.10%  |
|                              | II            | 32           | 57.20% |
|                              | III           | 20           | 35.70% |
| <b>Histological grade</b>    |               |              |        |
|                              | I             | 3            | 5.40%  |
|                              | II            | 40           | 71.40% |
|                              | III           | 13           | 23.20% |
| <b>ER status</b>             |               |              |        |
|                              | ER positive   | 54           | 96.40% |
|                              | ER negative   | 2            | 3.60%  |
| <b>PR status</b>             |               |              |        |
|                              | PR positive   | 36           | 64.30% |
|                              | PR negative   | 20           | 35.70% |
| <b>HER2 status</b>           |               |              |        |
|                              | HER2 positive | 15           | 26.80% |
|                              | HER2 negative | 41           | 73.20% |
| <b>Ki67 status</b>           |               |              |        |
|                              | ≤15%          | 22           | 39.30% |
|                              | >15%          | 34           | 60.70% |
