# Supplementary material for: Exosome-Transmitted tRF-16-K8J7K1B Promotes Tamoxifen Resistance by Reducing Drug-Induced Cell Apoptosis in Breast Cancer
Source: MDPI journal article supplement (doi:10.3390/cancers15030899), 2023-01-31
Supplement: s1 [file s1]

**Supplementary Table S2: Sequence of primers of tRFs and tiRNAs used for qRT-PCR.**

| Name                           | Sequence                                               |
|--------------------------------|--------------------------------------------------------|
| tRF-18-HRE9XFD2 RT             | GTCGTATCCAGTGCAGGGTCCGAGGTATTCGCACTGGATAC<br>GACTGGTGT |
| tRF-18-HRE9XFD2 Forward        | CGCGCGATCCCACTTCTG                                     |
| tRF-18-HRE9XFD2 Reverse        | AGTGCAGGGTCCGAGGTATT                                   |
| tRF-17-WSNKP92 RT              | GTCGTATCCAGTGCAGGGTCCGAGGTATTCGCACTGGATAC<br>GACTGGAGG |
| tRF-17-WSNKP92 Forward         | GCGCGTCTCGCTGGGG                                       |
| tRF-17-WSNKP92 Reverse         | AGTGCAGGGTCCGAGGTATT                                   |
| tRF-28-6978WPRLXND RT          | GTCGTATCCAGTGCAGGGTCCGAGGTATTCGCACTGGATAC<br>GACGAGAAT |
| tRF-28-6978WPRLXND<br>Forward  | GCTCGTTGGTCTAGGGGTATG                                  |
| tRF-28-6978WPRLXND<br>Reverse  | AGTGCAGGGTCCGAGGTATT                                   |
| tRF-16-489B3RB RT              | GTCGTATCCAGTGCAGGGTCCGAGGTATTCGCACTGGATAC<br>GACTGGAGG |
| tRF-16-489B3RB Forward         | CGCGCGCTCGGTGGAA                                       |
| tRF-16-489B3RB Reverse         | AGTGCAGGGTCCGAGGTATT                                   |
| tRF-16-K8J7K1B RT              | GTCGTATCCAGTGCAGGGTCCGAGGTATTCGCACTGGATAC<br>GACTGGTGG |
| tRF-16-K8J7K1B Forward         | CGCGCGCCCGGCATCT                                       |
| tRF-16-K8J7K1B Reverse         | AGTGCAGGGTCCGAGGTATT                                   |
| tRF-18-BS68BFD2 RT             | GTCGTATCCAGTGCAGGGTCCGAGGTATTCGCACTGGATAC<br>GACTGGTGT |
| tRF-18-BS68BFD2 Forward        | CGCGAACCGGGCGGAA                                       |
| tRF-18-BS68BFD2 Reverse        | AGTGCAGGGTCCGAGGTATT                                   |
| tRF-18-HR0VX6D2 RT             | GTCGTATCCAGTGCAGGGTCCGAGGTATTCGCACTGGATAC<br>GACTGGTGG |
| tRF-18-HR0VX6D2 Forward        | CGCGATCCCACCGCTG                                       |
| tRF-18-HR0VX6D2 Reverse        | AGTGCAGGGTCCGAGGTATT                                   |
| tRF-32-P4R8YP9L RT             | GTCGTATCCAGTGCAGGGTCCGAGGTATTCGCACTGGATAC<br>GACAGGCGA |
| tRF-32-P4R8YP9L Forward        | TGGGTGGTTCAGTGGTAGAATTC                                |
| tRF-32-P4R8YP9L Reverse        | AGTGCAGGGTCCGAGGTATT                                   |
| tRF-32-PNR8YP9L RT             | GTCGTATCCAGTGCAGGGTCCGAGGTATTCGCACTGGATAC<br>GACAGGCGA |
| tRF-32-PNR8YP9L Forward        | TTGGTGGTTCAGTGGTAGAATTC                                |
| tRF-32-PNR8YP9L Reverse        | AGTGCAGGGTCCGAGGTATT                                   |
| tRF-30-R9JP9P9NH5HY RT         | GTCGTATCCAGTGCAGGGTCCGAGGTATTCGCACTGGATAC<br>GACCAGATG |
| tRF-30-R9JP9P9NH5HY<br>Forward | GGGTTCATAGTGTAGTGGTTATCA                               |

---

|                     |                        |
|---------------------|------------------------|
| tRF-30-R9JP9P9NH5HY | AGTGCAGGGTCCGAGGTATT   |
| Reverse             |                        |
| U6 RT               | AACGCTTCACGAATTTGCGT   |
| U6 Forward          | CTCGCTTCGGCAGCACA      |
| U6 Reverse          | AACGCTTCACGAATTTGCGT   |
| TNFSF10 forward     | GCTGAAGCAGATGCAGGACAAG |
| TNFSF10 reverse     | GCTGACGGAGTTGCCACTTGAC |
| GAPDH Forward       | ATCAAGTGGGGCGATGCTG    |
| GAPDH Reverse       | ACCCATGACGAACATGGGG    |

---
